# Supplementary material for: Effect of a regular consumption of traditional and roasted oat and barley flakes on blood lipids and glucose metabolism–A randomized crossover trial
Source: PubMed Central journal article supplement (PMC9932717; doi:10.3389/fnut.2023.1095245), 2023-02-02
Supplement: Data_Sheet_1.pdf [file Data_Sheet_1.pdf]

Friedrich Schiller University Jena  
Institute of Nutritional Sciences  
Junior Research Group *Nutritional Concepts* (NuCo)  
Dornburger Str. 27/29  
07743 Jena

# 5-DAY FOOD FREQUENCY PROTOCOL

## gLUCAn-Study

**Subject number:** \_\_\_\_\_

**Start date:** \_\_\_\_\_

**End date:** \_\_\_\_\_

Dear participant,

using this food frequency log, we want you to document, what you eat in **five consecutive days**.

**Please note during filling out:**

1. Please keep the food frequency protocol always with you (at home, in a restaurant, etc.). **Write down everything, you eat and drink**, also sauces, nuts, candies and little snacks during watching TV.
2. Please do not change your dietary habits during these 5 days. We want to record your usual dietary habits with this food frequency protocol.
3. Make a streak for the indicated portion size. The protocol should be kept continuously so that no differentiation of single days is necessary.
4. Please do not change the portion sizes.
5. If you do not find a consumed food in the table, please add it to 'other'. Please give a specification of the food item as well as the consumed amount.

If there are any upcoming questions, do not hesitate to contact us:

**M. Sc. Sarah Reiners**

Junior Research Group *Nutritional Concepts*  
Institute for Nutritional Sciences  
Dornburger Str. 25  
07743 Jena  
tel.: 03641 / 949726

email: sarah.reiners@uni-jena.de

**Dr. Christine Dawczynski**

Junior Research Group *Nutritional Concepts*  
Institute for Nutritional Sciences  
Dornburger Str. 29  
07743 Jena  
tel.: 03641 / 949656

email: christine.dawczynski@uni-jena.de

| Quantity |             |      | Bread                                |
|----------|-------------|------|--------------------------------------|
|          | Pieces      | 45 g | Bun                                  |
|          | Pieces      | 50 g | Croissant (flaky pastry)             |
|          | Slices      | 45 g | Mixed wheat and rye bread            |
|          | Slices      | 45 g | Braided yeast bun                    |
|          | Slices      | 10 g | Crisp bread                          |
|          | Slices      | 20 g | White bread                          |
|          | Pieces      | 55 g | Whole-grain roll                     |
|          | Slices      | 50 g | Whole-grain bread                    |
|          | Slices      | 35 g | Wheat bread                          |
|          | Slices      | 10 g | Rusk                                 |
|          |             |      |                                      |
| Quantity |             |      | Sandwich filling                     |
|          | Teaspoons   | 5 g  | Butter                               |
|          | Teaspoons   | 5 g  | Margarine, linoleic acid 30-50%      |
|          | Teaspoons   | 5 g  | Margarine, linoleic acid >50%        |
|          | Portions    | 30 g | Blue cheese 50% FDM                  |
|          | Tablespoons | 30 g | Cream cheese                         |
|          | Portions    | 30 g | Soft cheese 60-85% FDM               |
|          | Slices      | 30 g | Semi-hard cheese 30% FDM             |
|          | Slices      | 30 g | Semi-hard cheese 50% FDM             |
|          | Slices      | 30 g | Camembert 45% FDM                    |
|          | Slices      | 30 g | Camembert 60-85% FDM                 |
|          | Slices      | 25 g | Ham sausage                          |
|          | Portions    | 25 g | Corned Beef                          |
|          | Slices      | 20 g | Bologna                              |
|          | Slices      | 30 g | Meat loaf                            |
|          | Portions    | 30 g | Liver sausage                        |
|          | Portions    | 30 g | Mettwurst                            |
|          | Portions    | 30 g | Tea sausage spread                   |
|          | Slices      | 20 g | Cervelat sausage                     |
|          | Slices      | 15 g | Lachsschinken                        |
|          | Slices      | 30 g | Wet-cured ham                        |
|          | Portions    | 30 g | Pork belly                           |
|          | Tablespoons | 20 g | Blossom honey                        |
|          | Tablespoons | 20 g | Jam                                  |
|          | Tablespoons | 20 g | Hazelnut spread                      |
|          | Portions    | 30 g | Veggie pastry                        |
|          |             |      |                                      |
| Quantity |             |      | Further supplements for breakfast    |
|          | Pieces      | 55 g | Hen's egg, cooked                    |
|          | Tablespoons | 4 g  | Cornflakes                           |
|          | Tablespoons | 6 g  | Cornflakes, roasted with sugar/honey |
|          | Tablespoons | 10 g | Cereal flakes                        |
|          | Tablespoons | 15 g | Muesli                               |

| Quantity |             |       | Milk and dairy goods                                                 |
|----------|-------------|-------|----------------------------------------------------------------------|
|          | Glasses     | 200 g | Buttermilk                                                           |
|          | Cups        | 150 g | Yoghurt, partly skimmed                                              |
|          | Cups        | 150 g | Yoghurt, full-fat                                                    |
|          | Cups        | 150 g | Yoghurt, low-fat with fruit preparation                              |
|          | Cups        | 150 g | Yoghurt, full-fat with fruit preparation                             |
|          | Glasses     | 200 g | Cow's milk, low-fat (1,5 %)                                          |
|          | Glasses     | 200 g | Cow's milk, full-fat (3,5 %)                                         |
|          | Glasses     | 200 g | Cow's milk with cocoa/chocolate                                      |
|          | Tablespoons | 20 g  | Quark 10% FDM                                                        |
|          | Tablespoons | 20 g  | Quark 20% FDM                                                        |
|          | Tablespoons | 10 g  | Whipping cream 30 % fat                                              |
|          | Portions    | 12 g  | Condensed milk 7.5 % fat                                             |
|          |             |       |                                                                      |
| Quantity |             |       | Fruits                                                               |
|          | Portions    | 125 g | Berries (blackberry, strawberry, blueberry, rawsberry, currant etc.) |
|          | Portions    | 150 g | Grapes, fresh                                                        |
|          | Portions    | 150 g | Pip fruit (apple, pear, quince etc.)                                 |
|          | Portions    | 150 g | Stone fruit (apricot, cherry, mirabelle, plum, peach etc.)           |
|          | Portions    | 120 g | Banana, fresh                                                        |
|          | Portions    | 150 g | Tropical fruits (pineapple, kiwi, mango, passion fruit etc.)         |
|          | Portions    | 150 g | Citrus fruits (grapefruit, mandarin, melone, orange, lemon etc.)     |
|          | Portions    | 50 g  | Raisins, dried fruit                                                 |
|          |             |       |                                                                      |
| Quantity |             |       | Other                                                                |
|          | Pieces      | 50 g  | Pickles                                                              |
|          | Portions    | 100 g | Nuts                                                                 |
|          | Portions    | 100 g | Olives                                                               |
|          | Cups        | 100 g | Peanuts (roasted and salted)                                         |
|          | Cups        | 50 g  | Peanut flips                                                         |
|          | Cups        | 30 g  | Chips                                                                |
|          | Portions    | 30 g  | Saltsticks                                                           |
|          |             |       |                                                                      |
| Quantity |             |       | Soups/Stews                                                          |
|          |             |       | <i>as a starter</i>                                                  |
|          | Portions    | 200 g | Buoillon                                                             |
|          | Portions    | 200 g | Soup, pale and thickened                                             |
|          | Portions    | 200 g | Tomato cream soup                                                    |
|          | Portions    | 200 g | Goulash soup                                                         |
|          |             |       | <i>as the main course</i>                                            |
|          | Portions    | 350 g | Pottage                                                              |
|          | Portions    | 400 g | Potato soup                                                          |
|          | Portions    | 450 g | Lentil stew                                                          |

| Quantity |             |       | Meat                            |
|----------|-------------|-------|---------------------------------|
|          | Portions    | 100 g | Minced meat of beef/pork, fresh |
|          | Portions    | 200 g | Veal, medium-fat                |
|          | Portions    | 200 g | Beef, medium-fat                |
|          | Portions    | 200 g | Pork, medium-fat                |
|          | Portions    | 170 g | Pig's offal, cooked             |
|          | Portions    | 170 g | Pork chop                       |
|          | Portions    | 200 g | Pork schnitzel breaded, fried   |
|          | Portions    | 100 g | Canned sausage                  |
|          | Portions    | 370 g | Fried chicken                   |
|          | Portions    | 170 g | Poultry, cooked                 |
|          |             |       |                                 |
| Quantity |             |       | Fish                            |
|          | Portions    | 175 g | Pollack, fried                  |
|          | Portions    | 175 g | Plaice, fried                   |
|          | Portions    | 175 g | Redfish, fried                  |
|          | Portions    | 175 g | Pangas catfish, fried           |
|          | Portions    | 175 g | Trout, fried                    |
|          | Portions    | 175 g | Salmon, fried                   |
|          | Portions    | 175 g | Zander, fried                   |
|          | Portions    | 175 g | Carp, steamed                   |
|          | Portions    | 85 g  | Tuna in water                   |
|          | Portions    | 100 g | Fried herring                   |
|          | Portions    | 125 g | Sardines in oil                 |
|          | Portions    | 65 g  | Canned herring                  |
|          |             |       |                                 |
| Quantity |             |       | Garnish                         |
|          | Portions    | 200 g | Potatoes, peeled and cooked     |
|          | Portions    | 200 g | Potato dish, fried              |
|          | Portions    | 200 g | Mashed potatoes                 |
|          | Pieces      | 100 g | Potato dumplings                |
|          | Pieces      | 75 g  | Potato pancake                  |
|          | Portions    | 180 g | Rice, cooked                    |
|          | Portions    | 180 g | Brown rice, cooked              |
|          | Portions    | 180 g | Pasta, egg-free and cooked      |
|          | Portions    | 180 g | Wholegrain pasta, cooked        |
|          | Pieces      | 100 g | Bread dumpling                  |
|          |             |       |                                 |
| Quantity |             |       | Sauces and fats                 |
|          | Portions    | 20 g  | Marinade of vinegar             |
|          | Portions    | 75 g  | Béchamel sauce                  |
|          | Portions    | 100 g | Minced meat sauce               |
|          | Portions    | 75 g  | Chasseur sauce                  |
|          | Portions    | 75 g  | Cheese sauce                    |
|          | Portions    | 20 g  | Barbecue sauce                  |
|          | Portions    | 20 g  | Tomato ketchup                  |
|          | Teaspoons   | 6 g   | Tomato purée                    |
|          | Teaspoons   | 6 g   | Mustard                         |
|          | Tablespoons | 12 g  | Mayonnaise 80% fat              |
|          | Tablespoons | 10 g  | Dripping (animal fat)           |

|                 |             |       |                                                                                       |
|-----------------|-------------|-------|---------------------------------------------------------------------------------------|
|                 | Tablespoons | 10 g  | Vegetable oils                                                                        |
| <b>Quantity</b> |             |       | <b>Vegetable / Salads</b>                                                             |
|                 | Portions    | 60 g  | Green salad with dressing                                                             |
|                 | Portions    | 180 g | Raw vegetable salad with cream sauce                                                  |
|                 | Portions    | 200 g | Leaf vegetables (celery, mangel, spinach, etc.)                                       |
|                 | Portions    | 200 g | Green beans, fresh                                                                    |
|                 | Portions    | 200 g | Fruit vegetables (aubergine, cucumber, pepper, tomato, courgette, etc.)               |
|                 | Portions    | 200 g | Sweetcorn, cooked                                                                     |
|                 | Portions    | 200 g | Cabbage (cauliflower, broccoli, white and red cabagge, kale, kohlrabi, sprouts, etc.) |
|                 | Portions    | 150 g | Sauerkraut                                                                            |
|                 | Portions    | 200 g | Stalk and leek vegetables (fennel, leek, asparagus)                                   |
|                 | Portions    | 200 g | Root vegetables (carrot, radish, Rettich, beetroot, turnips, celery, etc.)            |
|                 | Portions    | 120 g | Mushrooms, cooked                                                                     |
|                 |             |       |                                                                                       |
| <b>Quantity</b> |             |       | <b>Ready-made meal</b>                                                                |
|                 | Portions    | 250 g | Pasta salad with apples, tomatoes, and mayonnaise                                     |
|                 | Portions    | 250 g | Sausage salad                                                                         |
|                 | Portions    | 300 g | Greek salad                                                                           |
|                 | Portions    | 300 g | Italien salad                                                                         |
|                 | Pieces      | 100 g | Burger                                                                                |
|                 | Pieces      | 120 g | Cheeseburger                                                                          |
|                 | Pieces      | 200 g | Big Mac                                                                               |
|                 | Portions    | 200 g | Swabian pockets                                                                       |
|                 | Portions    | 300 g | Pancakes                                                                              |
|                 |             |       |                                                                                       |
| <b>Quantity</b> |             |       | <b>Legumes</b>                                                                        |
|                 | Portions    | 200 g | White beans, cooked                                                                   |
|                 | Portions    | 200 g | Peas, cooked                                                                          |
|                 | Portions    | 200 g | Lentils, cooked                                                                       |
|                 |             |       |                                                                                       |
| <b>Quantity</b> |             |       | <b>Desserts / Cake / Candies</b>                                                      |
|                 | Portions    | 150 g | Custard                                                                               |
|                 | Pieces      | 50 g  | Ice cream                                                                             |
|                 | Pieces      | 120 g | Fruit pie                                                                             |
|                 | Pieces      | 150 g | Cream pie                                                                             |
|                 | Pieces      | 60 g  | Stirred cake                                                                          |
|                 | Pieces      | 10 g  | Cookie                                                                                |
|                 | Pieces      | 20 g  | Milk chocolate                                                                        |
|                 | Pieces      | 10 g  | Filled chocolates                                                                     |
|                 | Pieces      | 3 g   | Hard caramels                                                                         |
|                 | Portions    | 50 g  | Gumdrop                                                                               |
|                 | Teaspoons   | 5 g   | White sugar                                                                           |
